# Supplementary material
Source: Preprints.org preprint supplement (doi:10.20944/preprints201905.0360.v2)
Supplement: Supplementary file 1 [file supplementary]

## Supplementary Figures and Tables

**Supplementary Table A.1:** *KLK8* expression in human brain single cells. Summarized are *KLK8* expression data from several studies [1-4] and databases [5-7]. Shown are fractions of cells with *KLK8* expression counts (in %) in neuronal as well as non-neuronal cells in several tissues and developmental stages.

|                          | Tissue                       | Developmental stage of donors | Number of nuclei | Fraction of cells with <i>KLK8</i> counts (%) |               |              |              |
|--------------------------|------------------------------|-------------------------------|------------------|-----------------------------------------------|---------------|--------------|--------------|
|                          |                              |                               |                  | Neuronal                                      |               | Non-neuronal | Unclassified |
|                          |                              |                               |                  | Excitatory                                    | Inhibitory    |              |              |
| <b>Allen Brain Atlas</b> | Primary visual cortex        | Adult                         | 8998             | 4 / 8063 (0.50)                               |               | 0/935        | -            |
|                          | Anterior Cingulate Cortex    | Adult                         | 7283             | -                                             | -             | -            | -            |
|                          | Middle temporal gyros        | Adult                         | 15928            | 37/10525 (3.52)                               | 8/4164 (1.92) | 1/914 (1.09) | -            |
| <b>GTEX</b>              | Prefrontal cortex            | Adult                         | 5932             | -                                             | -             | -            | -            |
|                          | Hippocampus                  | Adult                         | 9036             | 0/3501                                        | 0/1061        | 0/3773       | 6/701 (8.56) |
| <b>Linnarsson et al.</b> | Ventral midbrain             | Embryo                        | 1977             | -                                             | -             | -            | -            |
|                          | Middle temporal gyrus cortex | Adult                         | 2028             | -                                             | -             | -            | -            |
| <b>Zhong et al.</b>      | Prefrontal cortex            | Embryo                        | 2309             | -                                             | -             | -            | -            |
| <b>Darmanis et al.</b>   | Temporal lobe                | Adult and fetal               | 466              | 5/122 (40.98)                                 |               | 1/206 (4.85) | 0/138        |
| <b>PsychEncode</b>       | Neocortex                    | Fetal                         | 115              | 1/40 (25)                                     | 0/28          | 0/47         | -            |
|                          | Frontal cortex               | Fetal                         | 249              | 0/69                                          | 2/38 (52.63)  | 1/142 (7.04) | -            |
|                          | Pallium                      | Fetal                         | 398              | 0/0                                           | 2/143 (13.98) | 2/255 (7.84) | -            |
|                          | Frontal cortex               | Adult                         | 17093            | 0/8957                                        | 0/3721        | 0/4415       | -            |

| SNP        | MDD PGC + UKB |       | BD PGC |       | SZ PGC |       | ASD iPSYCH |       | ADHD iPSYCH |       |
|------------|---------------|-------|--------|-------|--------|-------|------------|-------|-------------|-------|
|            | OR            | P     | OR     | P     | OR     | P     | OR         | P     | OR          | P     |
| rs1722550  | 0.985         | 0.065 | 0.998  | 0.868 | 1.005  | 0.653 | 0.984      | 0.343 | 0.988       | 0.449 |
| rs1701946  | 0.986         | 0.074 | 1.009  | 0.498 | 1.002  | 0.889 | 0.977      | 0.163 | 0.986       | 0.391 |
| rs1612902* | 0.986         | 0.086 | 1.006  | 0.678 | 1.003  | 0.807 | 0.984      | 0.306 | 0.987       | 0.407 |

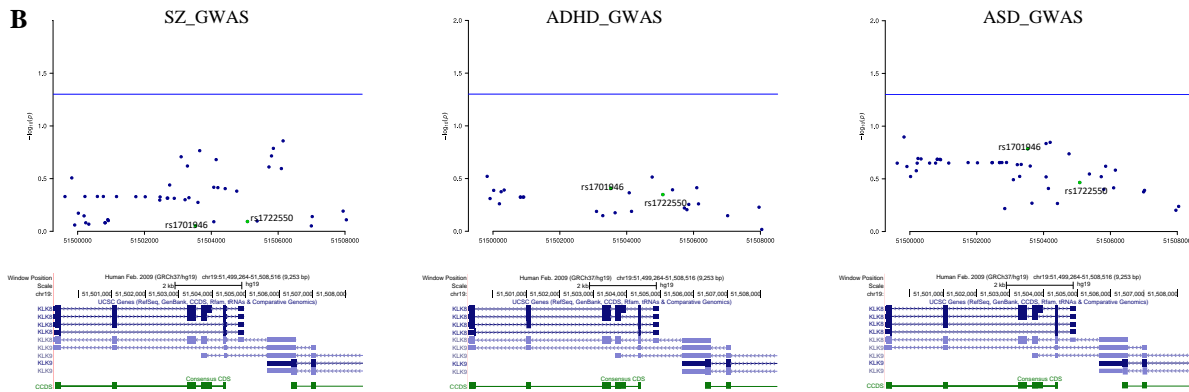

**Supplementary Figure A.1:** Single nucleotide polymorphisms (SNPs) associated with mental disorders. **A)** In the currently largest genome-wide association studies (GWASs) no significant association has been found between variants in the *KLK8* locus and the mental disorders major Schizophrenia (SZ), autism spectrum disorder (ASD) or attention deficit hyperactivity disorder (ADHD) [8-10]. However, three SNPs identified in a genotyping assay [11] show an association with BD and are depicted here in the context of GWAS data. **B)** Shown are SNPs identified in GWASs in relation to the UCSC genomic sequences of *KLK8* splice variants in blue. Blue line: nominal significant threshold of  $p < 0.05$ . Asterix indicate SNP located 3' to *KLK8*.

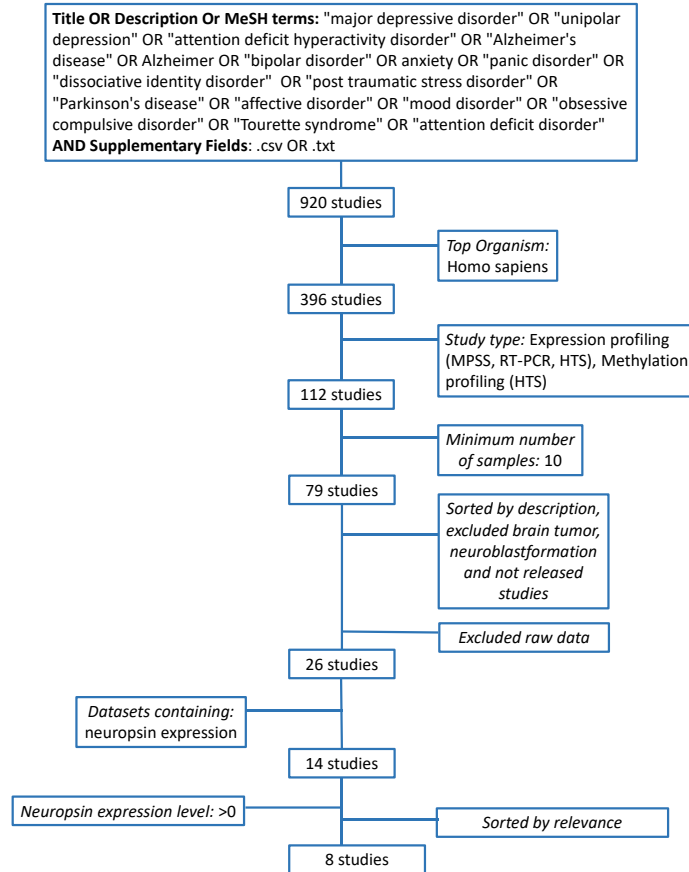

**Supplementary Figure A.2:** Flowchart describing the dataset search in MEDLINE and GEO. The last three steps in the flowchart describe the downstream workflow in R for identifying studies reporting *KLK8* expression levels in mental disorders.

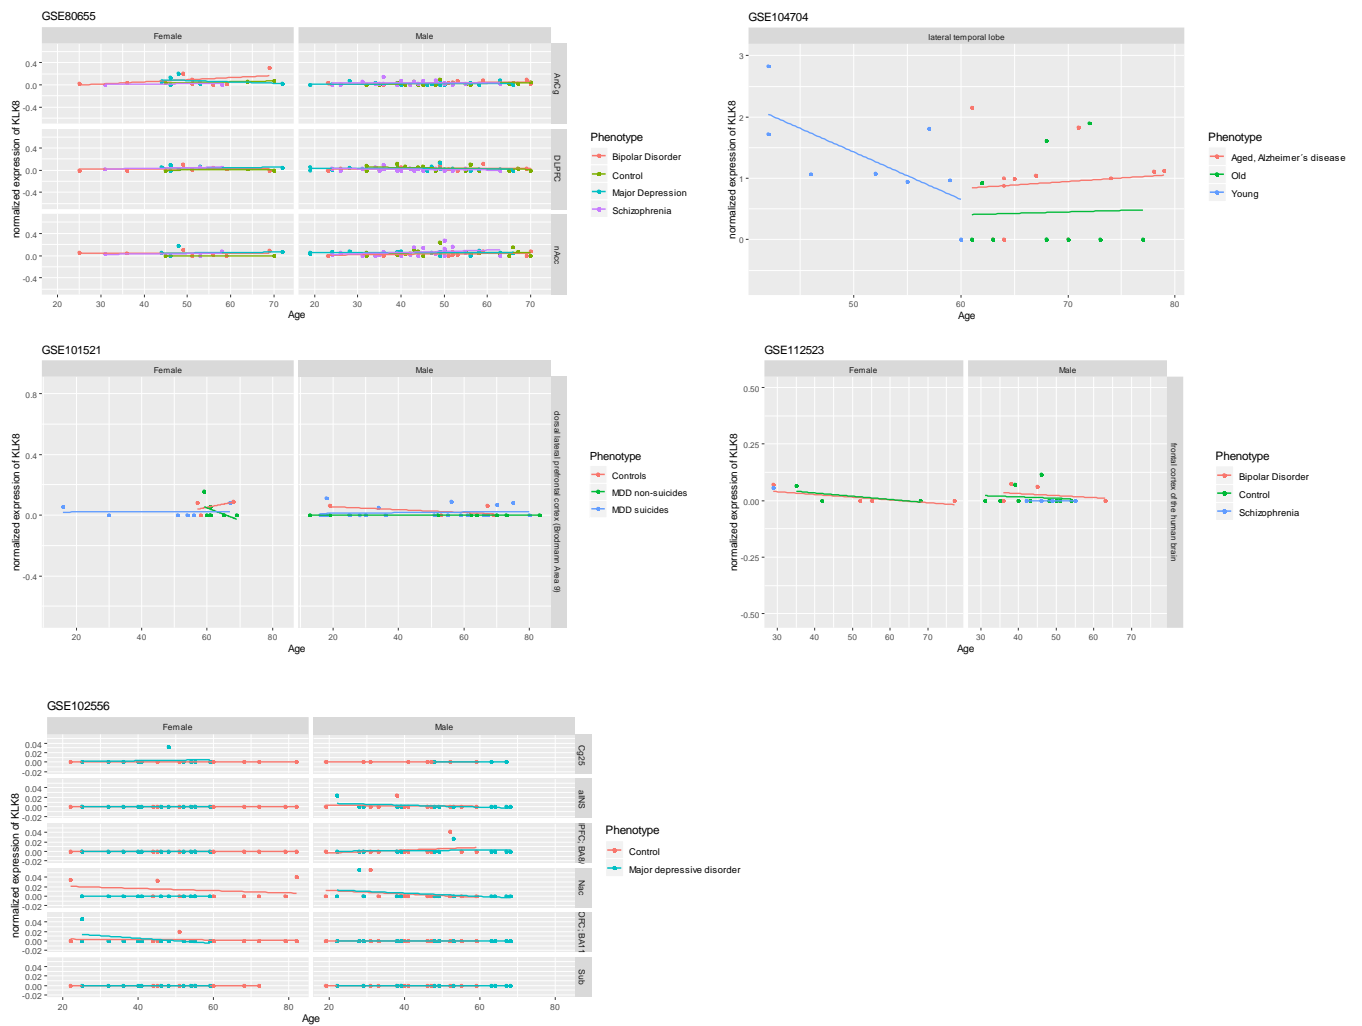

**Supplementary Figure A.3: *KLK8* expression in mental disorders.** Shown are *KLK8* expression levels by age in several brain tissues and several mental disorder phenotypes as well as healthy controls from selected studies identified as described in Supplementary Figure A.2. In GSE80655 the transcriptome in 281 clinically annotated human post-mortem brain tissues has been measured. GSE104704 compared the genome-wide enrichment of H4K16ac in the lateral temporal lobe of AD individuals against both younger and elderly cognitively normal controls. GSE101521 conducted whole-transcriptome brain expression profiling in MDD and suicide. GSE112523 studied DNA methylation in neurons from post-mortem brains in SZ and BD and GSE102556 combined differential expression and gene co-expression network analyses to provide a comprehensive characterization of male and female transcriptional profiles associated with MDD across six brain regions. Screening of the data from those studies did not reveal significant differences in *KLK8* expression levels between MDD, BD or SZ patients and healthy controls.

### References:

1. La Manno, G., et al., *Molecular Diversity of Midbrain Development in Mouse, Human, and Stem Cells*. Cell, 2016. **167**(2): p. 566-580 e19.
2. Zeisel, A., et al., *Brain structure. Cell types in the mouse cortex and hippocampus revealed by single-cell RNA-seq*. Science, 2015. **347**(6226): p. 1138-42.
3. Zhong, S., et al., *A single-cell RNA-seq survey of the developmental landscape of the human prefrontal cortex*. Nature, 2018. **555**(7697): p. 524-528.

4. Darmanis, S., et al., *A survey of human brain transcriptome diversity at the single cell level*. Proc Natl Acad Sci U S A, 2015. **112**(23): p. 7285-90.
5. Habib, N., et al., *Massively parallel single-nucleus RNA-seq with DroNc-seq*. Nat Methods, 2017. **14**(10): p. 955-958.
6. Wang, D., et al., *Comprehensive functional genomic resource and integrative model for the human brain*. Science, 2018. **362**(6420).
7. Science, A.I.f.B. *Allen Human Brain Atlas*. 2010; Available from: <https://portal.brain-map.org/atlasses-and-data/rnaseq>.
8. Schizophrenia Working Group of the Psychiatric Genomics, C., *Biological insights from 108 schizophrenia-associated genetic loci*. Nature, 2014. **511**(7510): p. 421-7.
9. Grove, J., et al., *Identification of common genetic risk variants for autism spectrum disorder*. Nat Genet, 2019. **51**(3): p. 431-444.
10. Demontis, D., et al., *Discovery of the first genome-wide significant risk loci for attention deficit/hyperactivity disorder*. Nat Genet, 2019. **51**(1): p. 63-75.
11. Izumi, A., et al., *Genetic variations of human neuropsin gene and psychiatric disorders: polymorphism screening and possible association with bipolar disorder and cognitive functions*. Neuropsychopharmacology, 2008. **33**(13): p. 3237-45.
